# Supplementary material
Source: Hindawi journal article supplement (doi:10.1155/2011/729382)

Supplemental figure 1

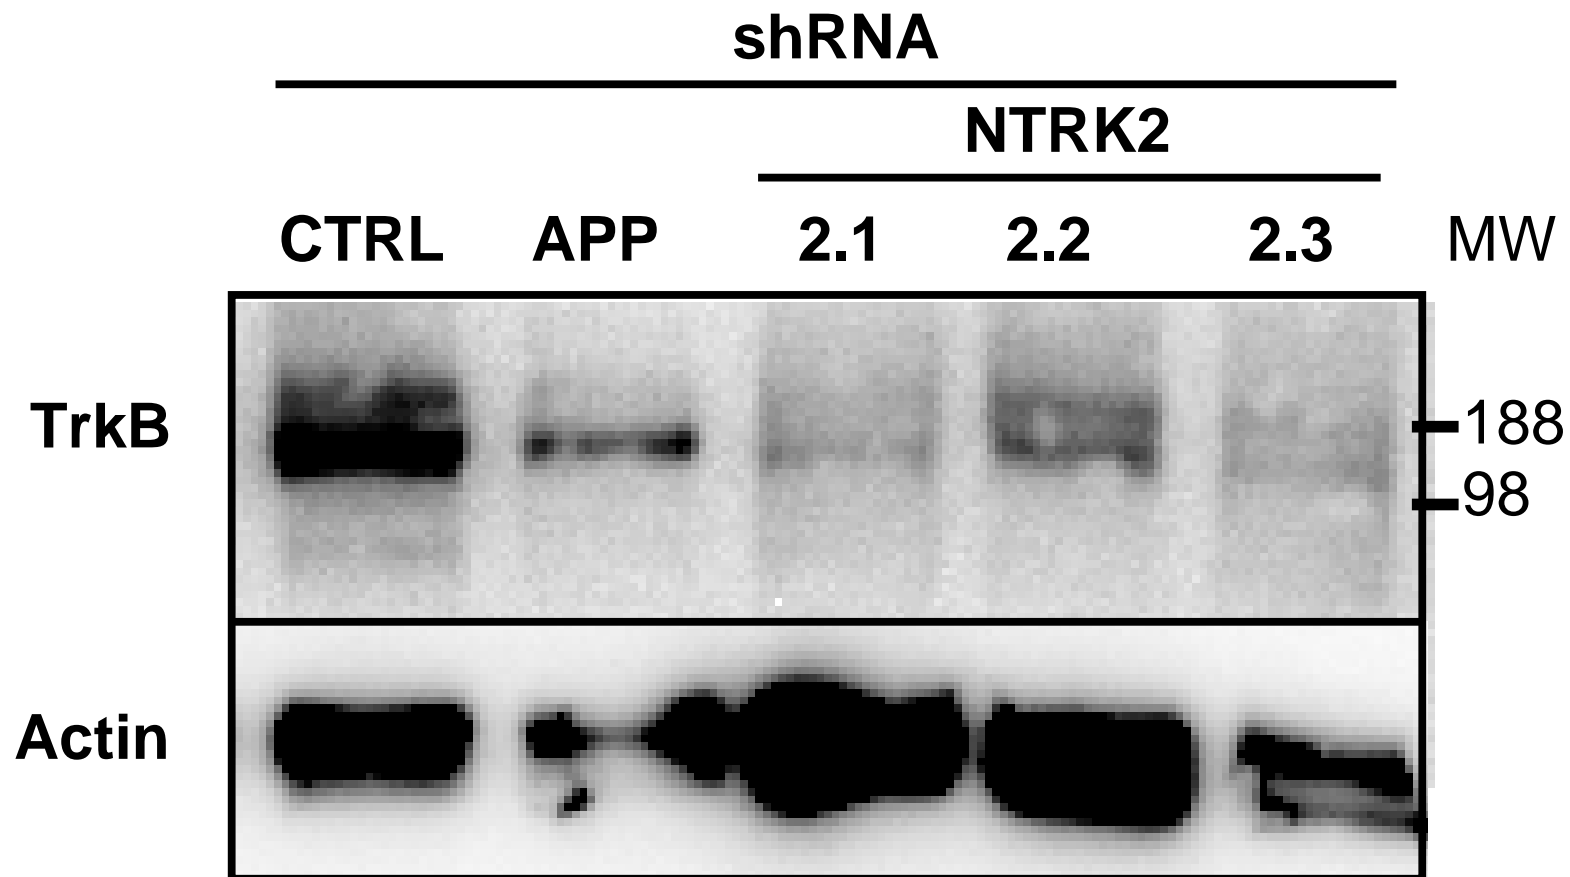

Supplement: f1 [file 729382.f1.pdf]

# Supplemental figure 3

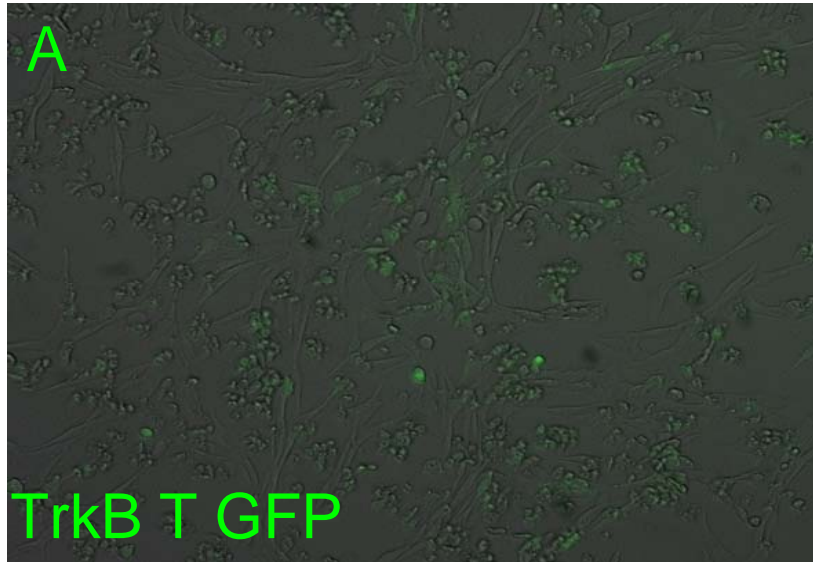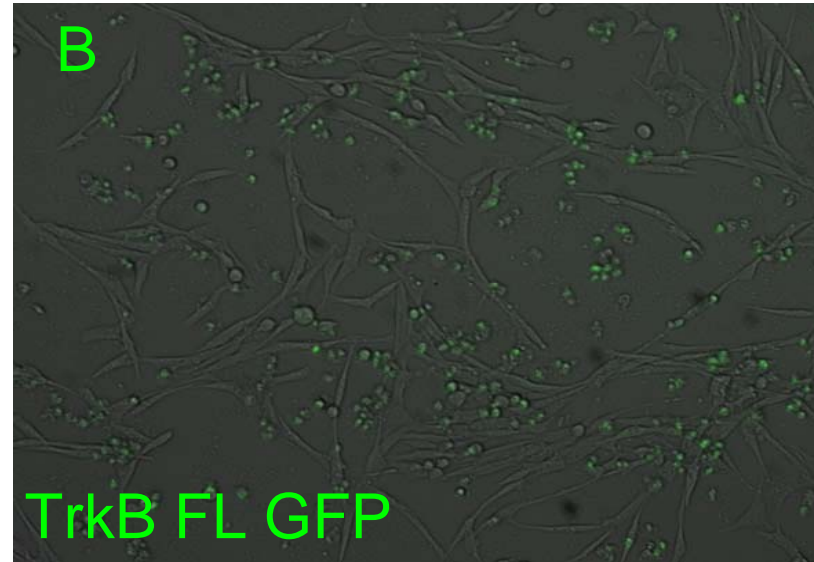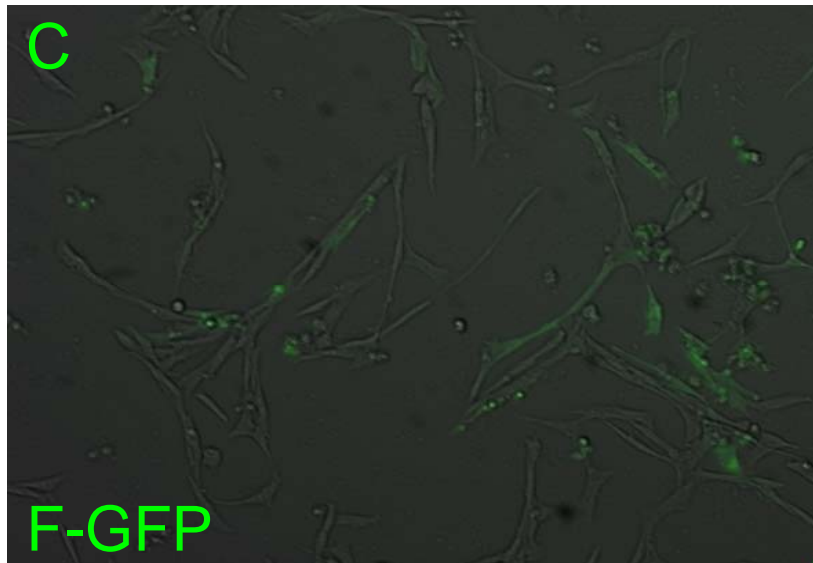

Supplement: f3 [file 729382.f3.pdf]

# Supplemental figure 4

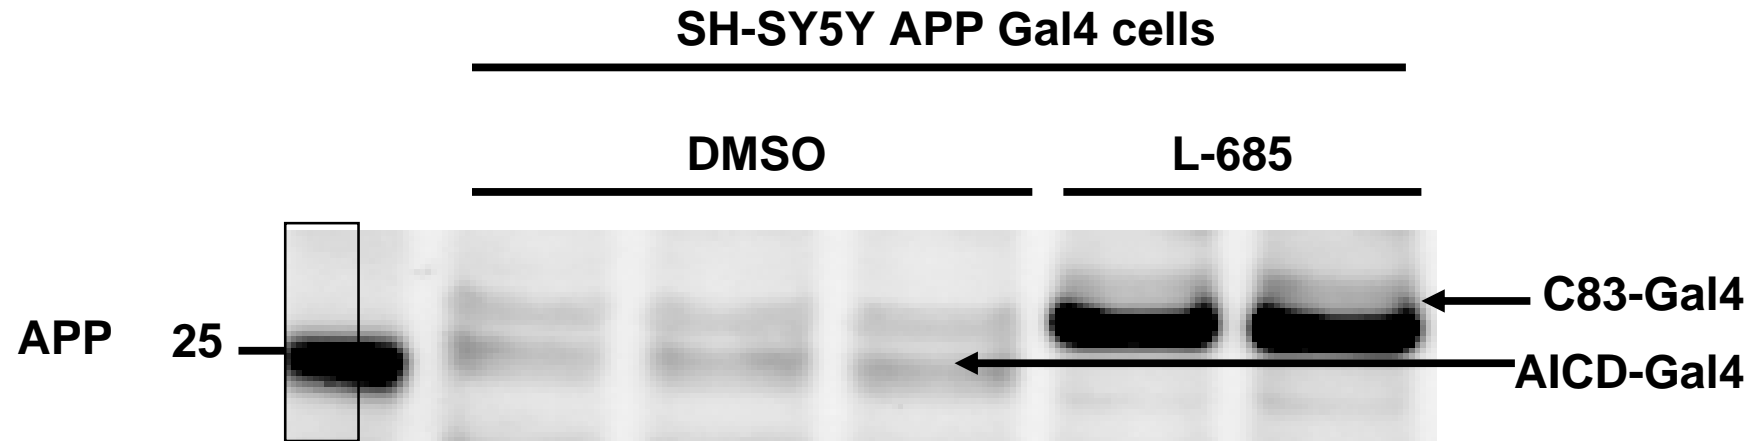

Supplement: f4 [file 729382.f4.pdf]

Supplemental figure 2

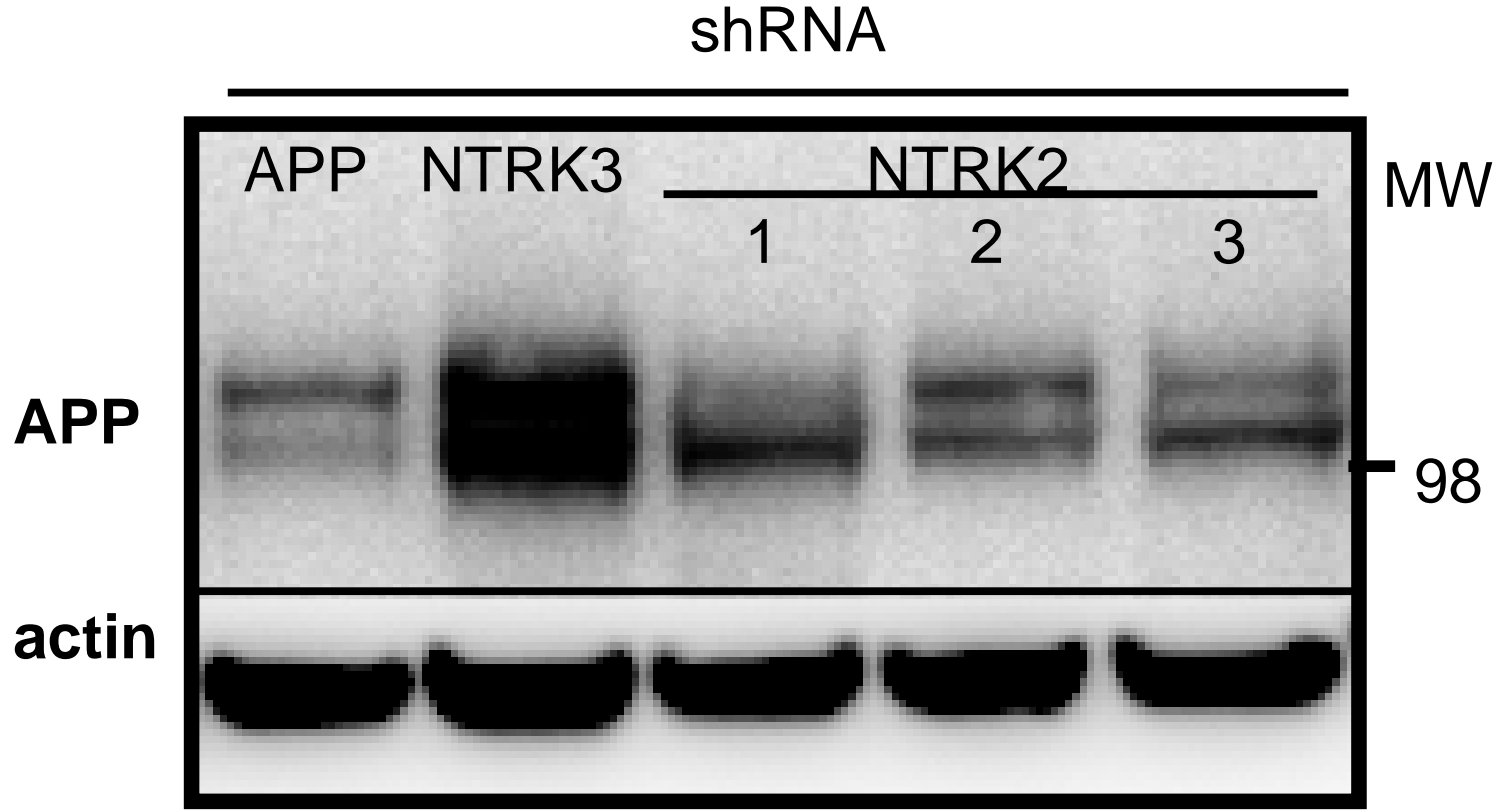

Supplement: f2 [file 729382.f2.pdf]
